# Supplementary material for: The IP6K Inhibitor LI-2242 Ameliorates Diet-Induced Obesity, Hyperglycemia, and Hepatic Steatosis in Mice by Improving Cell Metabolism and Insulin Signaling
Source: MDPI journal article supplement (doi:10.3390/biom13050868), 2023-05-20
Supplement: s1 [file s1]

**Supplementary figures, tables, and materials**

The IP6K inhibitor LI-2242 ameliorates diet-induced obesity, hyperglycemia, and hepatic steatosis in mice by improving cell metabolism and insulin signaling by Mukherjee et al.

**Figure S1**

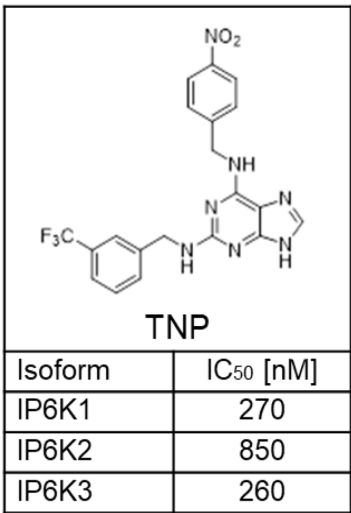

Figure S1: Reported structure and potency of TNP. Details and references are in the text.

**Figure S2**

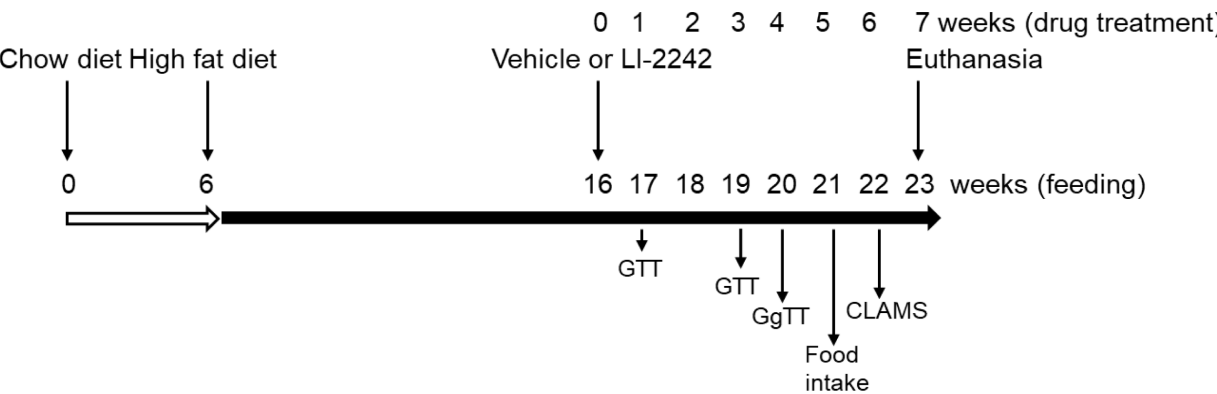

Figure S2: Study design to test in vivo efficacy of LI-2242 in DIO mice.

Figure S3

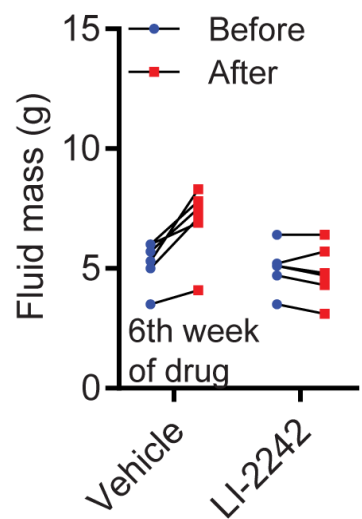

Figure S3: Fluid mass of DIO mice before and after vehicle and LI-2242 treatments.

Figure S4

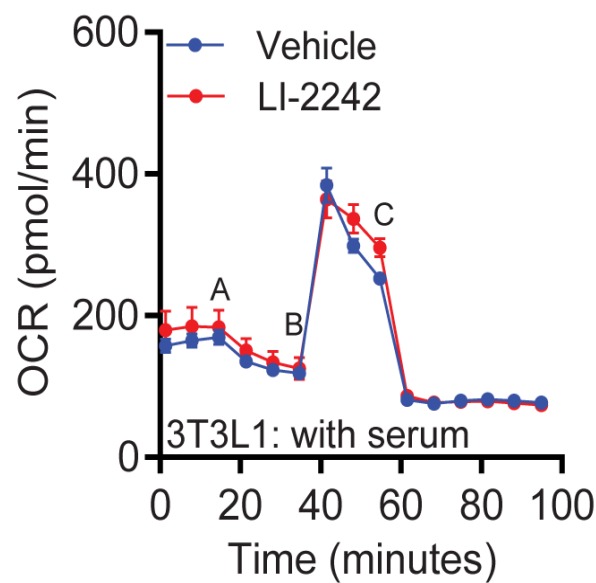

Figure S4: Mitochondrial OCR in vehicle- and LI-2242 [1  $\mu$ M]-treated 3T3L1 adipocytes under serum-containing conditions. Data represents an average of 7 individual wells.

**Figure S5 and S6**

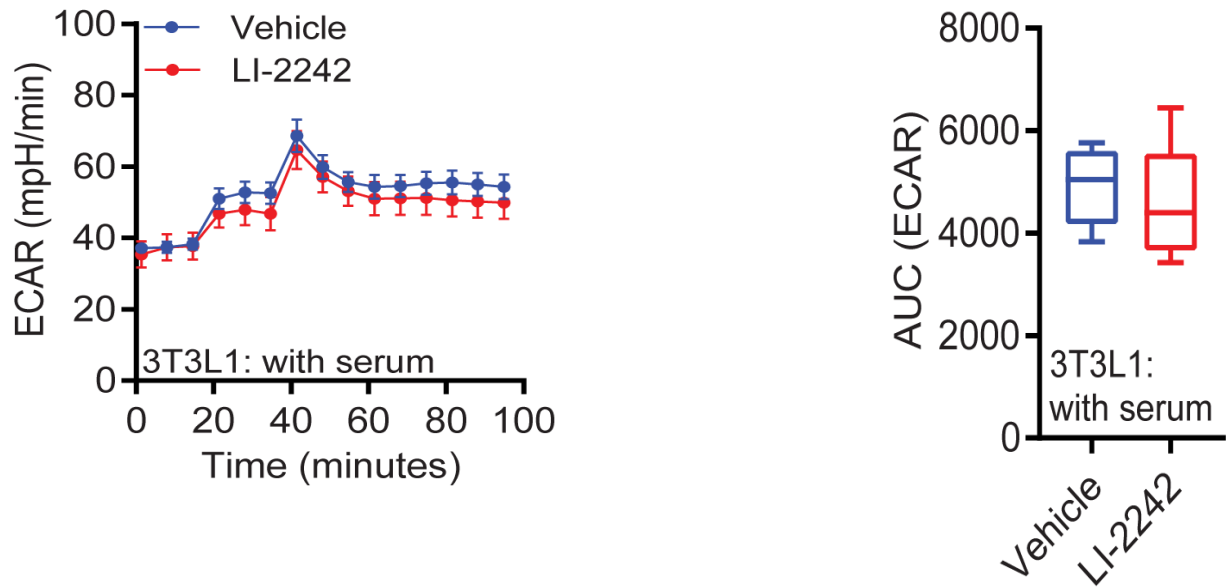

Figures S5 and S6: ECAR in vehicle- and LI-2242 [1  $\mu$ M]-treated 3T3L1 adipocytes under serum containing conditions. Data represents an average of 7 individual wells.

**Tables S1 and S2**

| <b>Formulation: 10 mg/kg, i.p. for 3 days (vehicle: 20% PEG 400 in PBS 0.2M, pH 7.4) N=3 mice</b> |                                      |               |           |
|---------------------------------------------------------------------------------------------------|--------------------------------------|---------------|-----------|
| Time (h)                                                                                          | Mean liver conc.<br>ng/ml ( $\mu$ M) | SD<br>(ng/ml) | CV<br>(%) |
| 24                                                                                                | 1605 (4)                             | 397           | 24.7      |

| <b>Formulation: 20 mg/kg, single i.p. (vehicle - DMSO:Tween 80:water, 0.5:1:8.5) N=3 mice</b> |         |        |        |        |
|-----------------------------------------------------------------------------------------------|---------|--------|--------|--------|
| Plasma PK                                                                                     | Unit    | Mean   | SD     | CV (%) |
| T <sub>1/2</sub>                                                                              | h       | 5.58   | 0.26   | 4.7    |
| T <sub>max</sub>                                                                              | h       | 0.67   | 0.29   | 43.3   |
| C <sub>max</sub>                                                                              | ng/mL   | 70079  | 23235  | 33.2   |
| AUC <sub>last</sub>                                                                           | h*ng/mL | 490188 | 199743 | 40.7   |
| AUC <sub>Inf</sub>                                                                            | h*ng/mL | 515497 | 215070 | 41.7   |
| AUC_%Extrap_obs                                                                               | %       | 4.68   | 0.85   | 18.3   |
| MRT <sub>Inf_obs</sub>                                                                        | h       | 6.97   | 0.39   | 5.56   |
| AUC <sub>last/D</sub>                                                                         | h*mg/mL | 24509  | 9987   | 40.7   |

Tables S1 and S2: Pharmacokinetic of LI-2242.

## Supplementary materials

Primer sequences used for qRT-PCR:

| qRT-PCR primers                 | Forward                   | Reverse                 |
|---------------------------------|---------------------------|-------------------------|
| <i>F4/80</i>                    | GGATATGGAACTTCAACTGCAA    | CAAGTGACAGAAGGAAGCATAAC |
| <i>Cd11c</i>                    | CAAATAGGTGGCCTCTACAAATG   | GTAGGACCACAAGCCAACA     |
| <i>Tnf<math>\alpha</math></i>   | AGACCCTCACACTCAGATCA      | GAGTAGACAAGGTACAACCCATC |
| <i>Cd36</i>                     | GGATGGTTTCCTAGCCTTTCA     | GTGGCCCGGTTCTAATTCA     |
| <i>Ucp1</i>                     | GTCAACACTTTGGAAAGGGAC     | CAACAAGAGCTGACAGTAAATGG |
| <i>Pgc1<math>\alpha</math></i>  | AGAAGCAGAAAGCAATTGAAGAG   | AACGGTAGGTGATGAAACCATAG |
| <i>Ppara<math>\alpha</math></i> | TGTGAAGGCTGTAAGGGCT       | CTTGGCATTCTTCCAAAGCGAAT |
| <i>PRDM16</i>                   | CTTTGGATGGGAGATGCTGAC     | CTACACGGATGTACTTGAGCC   |
| <i>AdipoQ</i>                   | TGTTCTCTTAATCCTGCCCA      | CCAACCTGCACAAGTTCCCTT   |
| <i>Hprt1</i>                    | CAAACCTTTGCTTTCCCTGGT     | TCTGGCCTGTATCCAACACTTC  |
| <i>Acaca</i>                    | CACCTGAAGACCTTAAAGCCAA    | CAGCCCACACTGCTTGTA      |
| <i>Fasn</i>                     | CACTATACTACCCAAGACAGGAACC | GGTCGAATAACTTGGAGTTCGG  |
| <i>Agpat1</i>                   | TCACCCAGGATGTGAGAG        | GAAGTCTTGATAGGAGGACATGA |
| <i>Gpat1</i>                    | TGTGCTACCTTCTCTCTAACGAA   | ATCTTCCTGGTCATCTTGCTCTG |
| <i>Mogat1</i>                   | TGGTGCCAGTTTGGTTCCAG      | TGCTCTGAGGTCGGGTTCA     |
| <i>Plin2</i>                    | GACCTTGTGTCCTCCGCTTAT     | CAACCGCAATTTGTGGCTC     |
| <i>Plin3</i>                    | ATGTCTAGCAATGGTACAGATGC   | CGTGGAAGTATAAGAGGCAGG   |
| <i>Cidea</i>                    | GCCGTGTTAAGGAATCTGCTG     | TGCTCTTCTGTATCGCCCAGT   |
| <i>Ppar<math>\gamma</math></i>  | TGTGGGGATAAAGCATCAGGC     | CCGGCAGTTAAGATCACACCTAT |
| <i>Cpt1a</i>                    | GAGGAACTCAAACCTATTCGTCT   | GTAGAGCCAGACCTTGAAGTAA  |
| <i>Rplp0</i>                    | AGATTCGGGATATGCTGTTGGC    | TCGGGTCCTAGACCAGTGTTTC  |

Reagents, chemicals, assay kits etc.:

| REAGENT or RESOURCE                         | SOURCE                    | IDENTIFIER   |
|---------------------------------------------|---------------------------|--------------|
| <b>Antibody</b>                             |                           |              |
| p-Akt (S473)                                | Cell Signaling Technology | 4060         |
| Akt                                         | Cell Signaling Technology | 7631         |
| GAPDH                                       | Sigma Aldrich             | G8795        |
| <b>Reagents, chemicals, assay kits etc.</b> |                           |              |
| DMEM                                        | Gibco                     | 11995-065    |
| Penstrep                                    | Gibco                     | 15070-063    |
| Amphotericin B                              | Cayman                    | 1397-89-3    |
| DMEM                                        | Gibco                     | A1443001     |
| Insulin                                     | Novo Nordisk              | 0169-1834-11 |
| Glucagon                                    | Cayman                    | 24204        |
| Glucose                                     | Amresco                   | 50997        |
| Pyruvate                                    | Fisher Scientific         | 113246       |
| Collagenase IV                              | Sigma Aldrich             | C5138        |
| Collagen I, rat tail                        | Corning                   | 354236       |
| Protein ladder                              | Thermo Fisher             | BP3603-1     |
| Prestained Protein Standards                | Biorad                    | 1610375      |

|                                        |                      |                                         |
|----------------------------------------|----------------------|-----------------------------------------|
| Protease+phosphatase inhibitor tablets | Thermo Fisher/Pierce | A32961                                  |
| Stripping buffer                       | Thermo Scientific    | 21059                                   |
| Mito Stress Test Kit                   | SeaHorse XF          | 103708-100, 102601-100                  |
| RNeasy Lipid Tissue Mini Kit           | Qiagen               | 74804                                   |
| High-Capacity RT Kit                   | Thermo Fisher        | 4368814                                 |
| Power SYBR Green PCR Master Mix        | Thermo Fisher        | 4367659                                 |
| AST assay kit                          | Teco Diagnostics     | A559-150                                |
| ALT assay kit                          | Teco Diagnostics     | A524-150                                |
| TAG assay kit                          | Teco Diagnostics     | T532-480                                |
| Insulin assay kit                      | Crystal Chem         | 90080                                   |
| Special diet                           |                      |                                         |
| High fat diet                          | TestDiets            | 58Y1 (based on D12492 of ResearchDiets) |

| Software and Algorithms         |                   |                                                                                                                       |  |
|---------------------------------|-------------------|-----------------------------------------------------------------------------------------------------------------------|--|
| GraphPad Prism 8.2.1            | GraphPad Software | <a href="https://www.graphpad.com/scientific-software/prism/">https://www.graphpad.com/scientific-software/prism/</a> |  |
| ImageJ                          | NIH               | <a href="https://imagej.nih.gov/ij/">https://imagej.nih.gov/ij/</a>                                                   |  |
| Adobe Photoshop and Illustrator | Adobe Inc.        | <a href="https://www.adobe.com/creativecloud.html">https://www.adobe.com/creativecloud.html</a>                       |  |
